# Supplementary material for: CoNi2S4@CoNi-LDH heterojunction grown on SSM as a highly efficient trifunctional catalyst for water-splitting and Zn–air batteries
Source: Royal Society of Chemistry journal article supplement (doi:10.1039/d3tc03336h), 2023-01-01
Supplement: d3tc03336h1.pdf [file d3tc03336h1.pdf]

## Electronic Supplementary Information

### **CoNi<sub>2</sub>S<sub>4</sub>@CoNi-LDH heterojunction grown on SSM as highly-efficient trifunctional catalyst for water-splitting and Zn-air battery**

Zhuo Wang,<sup>#,a</sup> Juan Jian,<sup>#,a</sup> Xiuyan Wang,<sup>\*,a</sup> Yu Qiao,<sup>a</sup> Meiting Wang,<sup>a</sup> Shuang Gao,<sup>a</sup> Ping Nie<sup>a</sup> and Limin Chang<sup>\*,a</sup>

## **1. Material and experimental instruments**

### **1.1 Materials used in the experiment**

Pt/C (20 wt%) was obtained from Macklin Ltd. (Shanghai, China). RuO<sub>2</sub> was synthesized from ruthenium chloride hydrate (RuCl<sub>3</sub>·3H<sub>2</sub>O) purchased from Beijing Chemical Reagents Company.<sup>1</sup> (Beijing, China). Stain steel mesh (SSM) was provided by the Hao Ke Technology Co. Ltd. (Beijing, China). KOH, Co(NO<sub>3</sub>)<sub>2</sub>·6H<sub>2</sub>O, Ni(NO<sub>3</sub>)<sub>2</sub>·6H<sub>2</sub>O, urea and other chemicals are supplied by the Beijing Chemical Reagents Company.

### **1.2 Experimental Section**

#### **1.2.1 Characterizations**

X-ray diffraction (XRD) experiment was tested on a Rigaku D-Max 2550 diffractometer with Cu-K $\alpha$  radiation ( $\lambda = 1.5418 \text{ \AA}$ ). Scanning electron microscope (SEM) and energy dispersive X-ray (EDX) spectroscopy images were obtained on a JEOL-6700 scanning electron microscope. X-ray photoelectron spectra (XPS) analysis was performed on a VG Scienta R3000 spectrometer with Al K $\alpha$  (1486.6 eV) as the X-ray source. Transmission electron microscope (TEM), high resolution TEM (HRTEM) images were obtained with microscopy of Philips-FEI Tecnai G2S-Twin, equipped with a field emission gun operating at 200 kV.

#### **1.2.2 Electrochemical measurements**

The electrochemical measurements were conducted using the three-electrode system with the electrochemical workstation (CHI 760e). The as-prepared electrodes were directly used as the work electrodes; meanwhile, graphite rod and Hg/HgO electrode were served as counter and reference electrodes, respectively. 1.0 M KOH solution and 0.1 M KOH solution was used as electrolyte for OER and ORR devices. Potentials were normalized versus the standard hydrogen electrode (RHE) according to formula below:

$$E(\text{RHE}) = E(\text{Hg}/\text{HgO}) + 0.098\text{V} + 0.591\text{pH}$$

Here, “E(Hg/HgO)” is the potential we directly measured during the experiment. For that we applied the 1.0 M KOH throughout the OER test, pH = 14; we applied 0.1 M KOH throughout the ORR test, pH = 13.

Polarization curves were performed via sweeping potentials at a scan rate of 2.0 mV·s<sup>-1</sup> and without further IR rectification. Corresponding stabilities were examined through current-time curves at the constant potentials.

The data of Tafel slope can be plotted by the gained linear sweep voltammetry (LSV) curves, which is obtained from the follow equation:

$$\eta = a + b \log j$$

Where, “ $\eta$ ” refers to the overpotential; “ $j$ ” is the current density; “ $a$ ” relates to the  $j_0$  (exchange current density) and can be reflected by the intercept; “ $b$ ” is the Tafel slope we need to acquire.

The electrochemical surface area (ECSA) is calculated by the formula below:

$$\text{ECSA} = A * C_{\text{dl}} / C_s$$

Where “ $A$ ” refers to the area of the working electrode, and we set the electrode area to 0.25 cm<sup>2</sup> throughout the electrocatalytic testing; “ $C_s$ ” relates to the electrolyte and  $C_s = 0.04 \text{ mF}\cdot\text{cm}^{-2}$ , “ $C_{\text{dl}}$ ” is the abbreviation of double layer capacitance and calculated from a series of CV curves that tested within the non-Faraday potential range (0.9254-1.0254 V vs. RHE), scan rate changed from 10 to 100 mV·s<sup>-1</sup>, increased with 10 mV·s<sup>-1</sup> each time.

Electrochemical impedance spectroscopy (EIS) measurements are also performed with the three-electrode cell system in 1.0 M KOH, and the frequency range is from 0.1 Hz to 10 KHz, the amplitude is 5 mV.

### 1.2.3 Assembly and Testing of the Zn-Air Battery

As for the liquid Zn-air battery, in order to avoid electrolyte leakage, we physically compounded the SSM-based catalyst with the waterproof/breathable carbon film, and then assembled the complex as the air-cathode of the Zn-air battery.<sup>1</sup> In this work, we respectively adopt CoNi-LDH/SSM, CoNi<sub>2</sub>S<sub>4</sub>@CoNi-LDH/SSM and Pt/C+RuO<sub>2</sub>/SSM electrodes as air-cathodes, zinc sheets were used as metal-anode to assemble water-based Zn-air batteries. Wherein, the applied electrolyte is the mixture of 6.0 M KOH and 0.02 M Zn(CH<sub>3</sub>COOH)<sub>2</sub>.

Both the charge and discharge curves were measured by the CHI 760e, the power density was calculated from the data of the discharge curve. Charge-discharge curves at current density of 5 mA·cm<sup>-2</sup> in this work were measured by the Land battery test system.

Related Figures and Tables:

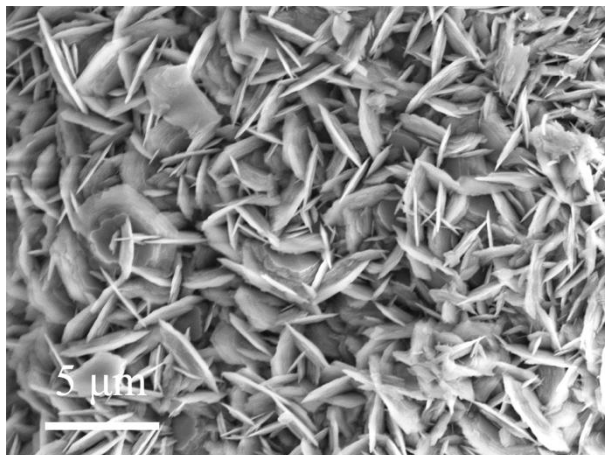

Fig. S1. SEM image of CoNi-LDH/SSM.

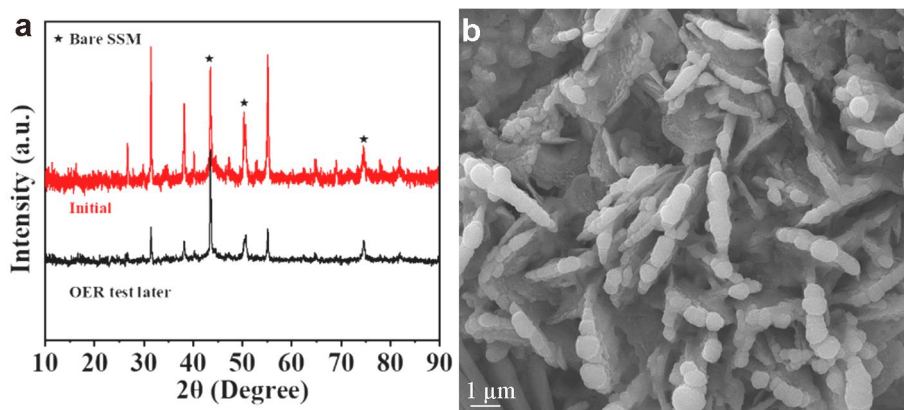

Fig. S2. (a) XRD and (b) SEM image of CoNi<sub>2</sub>S<sub>4</sub>@CoNi-LDH/SSM after i-t test for OER.

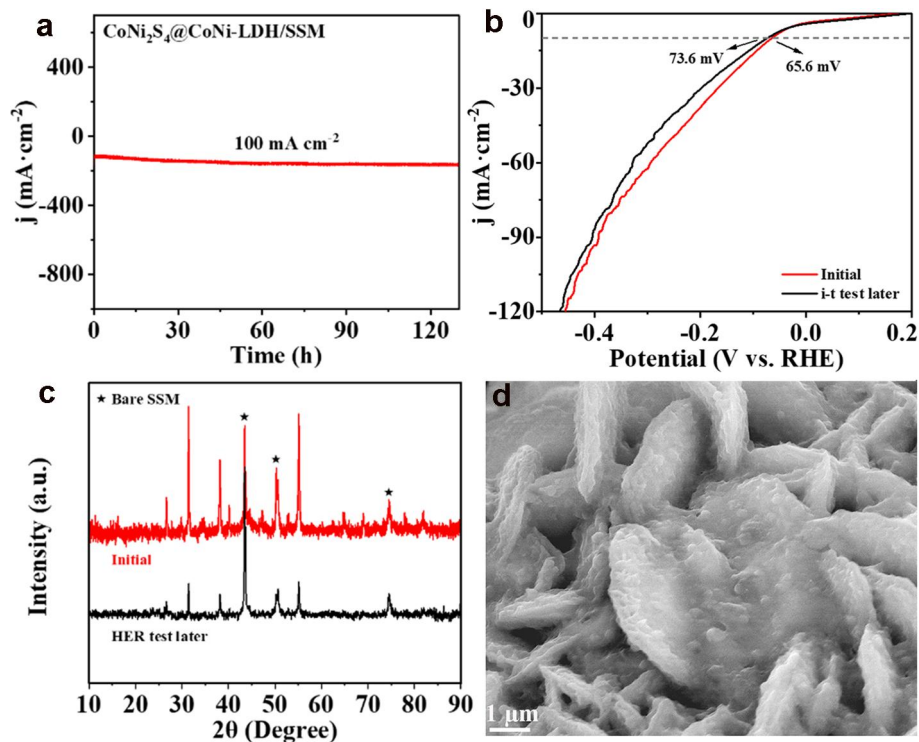

**Fig. S3.** The (a) *i-t* curves of  $\text{CoNi}_2\text{S}_4@\text{CoNi-LDH/SSM}$  that when the provided potential is  $-0.416\text{ V}$ . (b) LSV curves that before and after the *i-t* testing and corresponding (c) XRD and (d) SEM image that the *i-t* test later for HER.

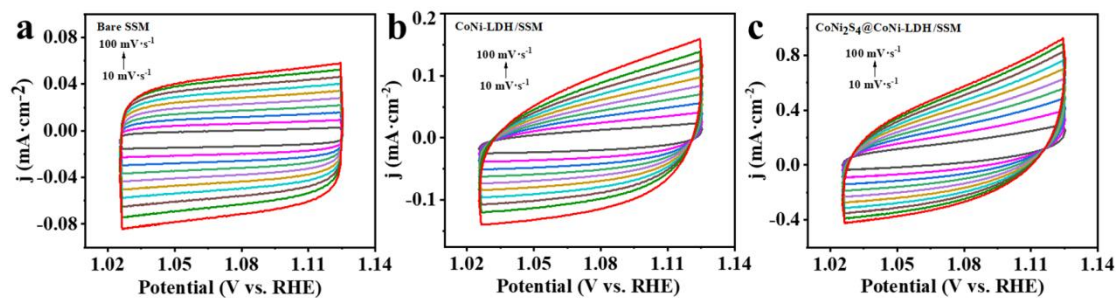

**Fig. S4.** The CV curves at different scan rate of (a) bare SSM, (b)  $\text{CoNi-LDH/SSM}$  and (c)  $\text{CoNi}_2\text{S}_4@\text{CoNi-LDH/SSM}$ .

**Table S1.**  $C_{dl}$ ,  $C_s$  and calculated ECSA data of the related catalysts.

|                                               | $C_{dl}$ ( $\text{mF}\cdot\text{cm}^{-2}$ ) | $C_s$ ( $\text{mF}\cdot\text{cm}^{-2}$ ) | ECSA ( $\text{cm}^2$ ) |
|-----------------------------------------------|---------------------------------------------|------------------------------------------|------------------------|
| $\text{CoNi}_2\text{S}_4@\text{CoNi-LDH/SSM}$ | 2.07                                        | 0.04                                     | 12.94                  |
| $\text{CoNi-LDH/SSM}$                         | 0.44                                        | 0.04                                     | 2.75                   |
| Bare SSM                                      | 0.26                                        | 0.04                                     | 1.66                   |

**Table S2.**  $R_s$  and  $R_{ct}$  data of the related samples.

|                                                | $R_s$ ( $\Omega$ ) | $R_{ct}$ ( $\Omega$ ) |
|------------------------------------------------|--------------------|-----------------------|
| CoNi <sub>2</sub> S <sub>4</sub> @CoNi-LDH/SSM | 1.90               | 0.46                  |
| CoNi-LDH/SSM                                   | 1.90               | 1.42                  |
| Bare SSM                                       | 1.90               | 10.13                 |

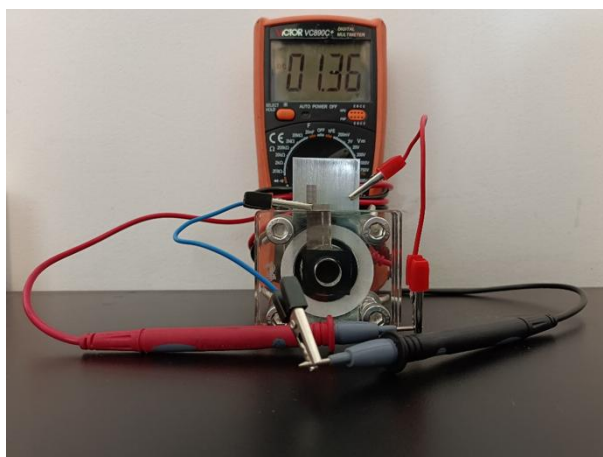

**Fig. S5.** The open circuit potential of the ZAB that assembled using the as synthesized CoNi<sub>2</sub>S<sub>4</sub>@CoNi-LDH/SSM applied for air-cathode.

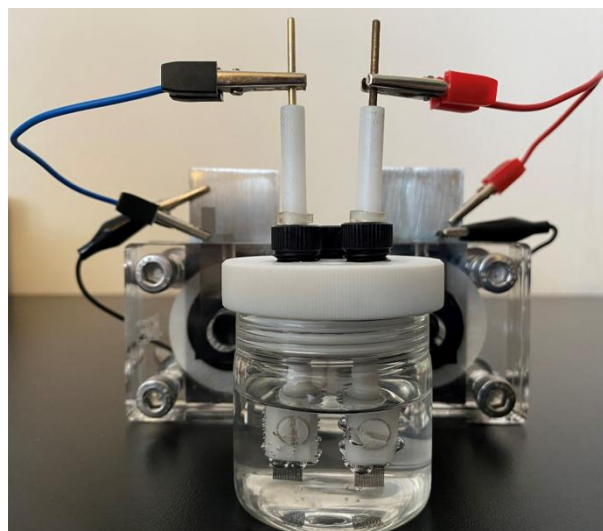

**Fig. S6.** Actual photograph of the self-powered electrocatalytic water-splitting device that assembled by two ZABs using CoNi<sub>2</sub>S<sub>4</sub>@CoNi-LDH/SSM directly as the air cathode.

## Reference

(1) Jian, J.; Nie, P.; Wang, Z.; Qiao, Y.; Wang, H. R.; Zhang, C. Y.; Xue, X. X.; Fang, L.; Chang, L. M. V<sup>5+</sup>-Doped Potassium Ferrite as an Efficient Trifunctional Catalyst for Large-Current-Density Water Splitting and Long-Life Rechargeable Zn-Air Battery, *ACS Appl. Mater. Interfaces*. 2022, 14 (32), 36721-36730.
